# Supplementary material for: Selective production of lactitol from lactose using the Lewis acid site of MOF catalysts without exogenous hydrogen
Source: Royal Society of Chemistry journal article supplement (doi:10.1039/d4nj05012f), 2025-01-01
Supplement: d4nj05012f1.pdf [file d4nj05012f1.pdf]

**Selective production of lactitol from lactose using the Lewis acid site  
of MOF catalysts without exogenous hydrogen**

Donghui Xie <sup>a#</sup>, Keyu Xing <sup>a#</sup>, Haopeng Fan <sup>a</sup>, Keyu Xu <sup>a</sup>, Pei Jia <sup>a</sup>, Li Yao <sup>a</sup>, Yunhui Cheng <sup>a</sup>, Zhou Xu <sup>a\*</sup>

<sup>a</sup> Hunan Provincial Key Laboratory of Cytochemistry, School of Food Science and Bioengineering, Changsha University of Science & Technology, Changsha, 410114, Hunan, China

<sup>b</sup> School of Food Science and Engineering, Qilu University of Technology, Jinan 250353, China

<sup>c</sup> State Key Laboratory of Utilization of Woody Oil Resource, Hunan Academy of Forestry, Changsha, 410004, Hunan, China

<sup>#</sup>These authors contributed equally to the work.

\*Corresponding authors at: Hunan Provincial Key Laboratory of Cytochemistry, School of Food Science and Bioengineering, Changsha University of Science & Technology, Changsha 410114, Hunan, China.

E-mail address: xz\_jnu@126.com (Zhou Xu)

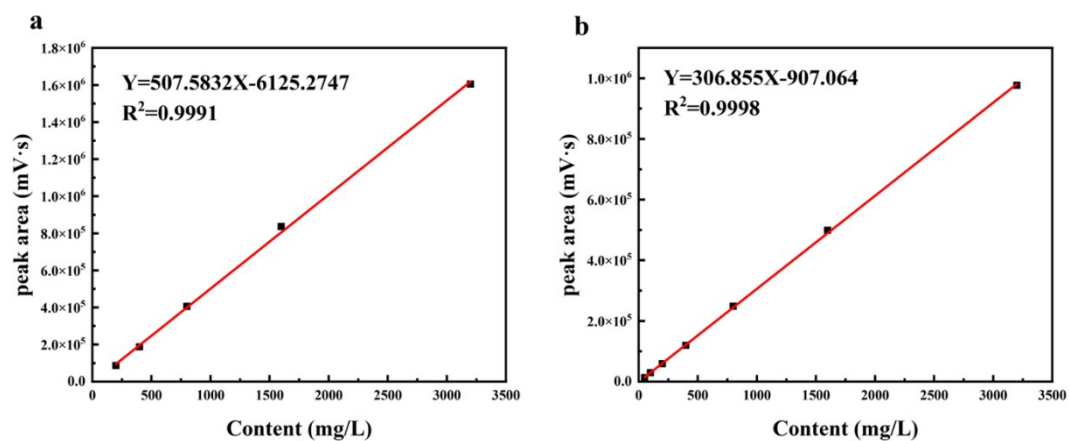

Figure S1 Calibration plots of (a) Lactose, (b) Lactitol standards by HPLC method.

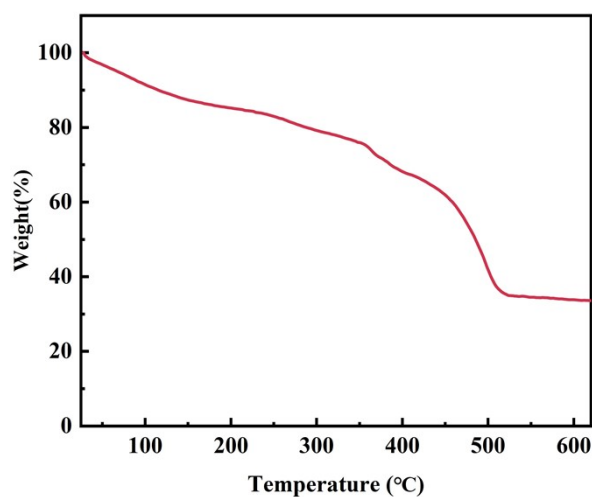

Figure S2 TGA curve of MIL-101(Fe).

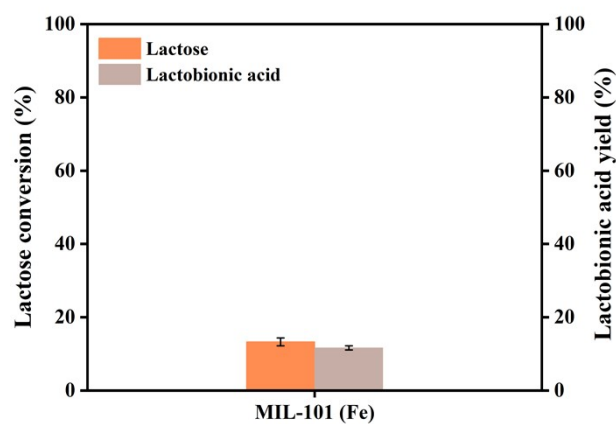

Figure S3 MIL-101(Fe) catalyzed lactose in aqueous solution.
